# Supplementary material for: Sequence and Annotation of the Apicoplast Genome of the Human Pathogen Babesia microti
Source: PubMed Central journal article supplement (PMC4184790; doi:10.1371/journal.pone.0107939), 2014-10-03

**Table S1: Primers used to assemble and sequence the *B.microti* apicoplast genome.** Coordinates are given according to the sequence available at accession number LK028575. Primer orientation: w for Watson strand and c for Crick strand.

| Name         | Sequence                                       | Begin | End   | Strand |
|--------------|------------------------------------------------|-------|-------|--------|
| rps2.2       | CCGATTGTTATACCATTAACTATAAAGAAG                 | 131   | 101   | c      |
| api1_tRNA    | TCGAGTCTGCATCTTATTTATTTAGGTAATTAACCTAATGG      | 915   | 955   | w      |
| ctg1_ssu     | GATTTAATCTCCCTTCACAAGACATTACTTTGTCTAG          | 1542  | 1506  | c      |
| BA39YPO6-R   | TATAGACCCGAACCCAAATGATCT                       | 3486  | 3509  | w      |
| AA3YN24-F    | AGTAACGGAGGTGAACAAAGGT                         | 5002  | 5023  | w      |
| AA3YN24-FF   | GATTTGTAATCAGTAGAATATGAGTT                     | 5695  | 5720  | w      |
| BA39YPO6-F   | AACTCATATTCTACTGATTACAAATCA                    | 5720  | 5694  | c      |
| AA3YN24-R    | TTTTCAATAGTTAGAAAAATTCCTCATT                   | 6967  | 6940  | c      |
| BA20YL13-R   | AAAAGTACTAATATATTTGTTGGTGGTT                   | 7875  | 7902  | w      |
| Ctg1b_F      | CCACATGGAGGAGGAGAAGG                           | 8843  | 8862  | w      |
| BA20YL13-RR  | ATGGAGGAGGAGAAGGTAA                            | 8847  | 8865  | w      |
| BA20YL13-FF  | TTTTACCTTCTCCTCCTCCA                           | 8867  | 8848  | c      |
| BA20YL13-LST | TAATTGAACCTTTAAGTAGTT                          | 9616  | 9636  | w      |
| ctg1_rps3    | TATATTCAGGTAGGTTTAAATAAGTTAAATAATAGATCAAAAGTTG | 9751  | 9795  | w      |
| BA20YL13-F   | ACTTATTAACCTACCTGAATATATA                      | 9774  | 9709  | c      |
| RPL1_Long    | TTATATCAAAAAGTTTTGGATCAATATCATCAAGTCAATTAGAATC | 10042 | 10087 | w      |
| Gap3.1       | TAAGTTTTTATGCTAAAGTCTTTTGGTAAATAAGT            | 11143 | 11180 | w      |
| Gap3.2       | AATTAATTTTATACTTATTTACAAAAGAAGCTTAGCCA         | 11192 | 11154 | c      |
| 5948.1       | ATAATGAAGAACGTATTAATAAGTAAATAATAGTCAAAAGTAGT   | 11705 | 11750 | w      |
| Gap3.3       | GAAAAAATAAATAAAAAGAAAAAGTATTGACCCAATTAAGA      | 12127 | 12168 | w      |
| Gap3.4       | ACTTATAAATTTTTAATATAAGTATATATAATCTTAATTGGGT    | 12200 | 12157 | c      |
| 5948.1       | ATAATGAAGAACGTATTAATAAGTAAATAATAGTCAAAAGTAGT   | 12470 | 12515 | w      |
| Gap3.3       | GAAAAAATAAATAAAAAGAAAAAGTATTGACCCAATTAAGA      | 12893 | 12933 | w      |
| Gap3.4       | ACTTATAAATTTTTAATATAAGTATATATAATCTTAATTGGGT    | 12965 | 12924 | c      |
| Gap3_PRA4    | CTATAGTAAGATAATTAATAATTAATACCCTATC             | 13141 | 13108 | c      |
| Gap3_seq1.1  | AAATTATATTATTTAAAAATTACGGATTAATAACAGT          | 13400 | 13437 | w      |
| Gap3_PRA3    | CCTTTACCAGTATAAACATTATACTTTTTAATATTTTTATTCTAC  | 13568 | 13523 | c      |
| Gap3_PRA1    | GGTAATAAAACAGGATGGTGTGGATTAGGAGT               | 13871 | 13902 | w      |
| Gap3_seq1.2  | ATCTCTAAATCTATTAATAAATTTAATTTTACAACCTTT        | 14056 | 14018 | c      |
| Gap3_PRA9    | TTATTTTATAATTTAAAAATTTACACTTATGGTATAGGT        | 14303 | 14341 | w      |
| Gap3_PRA10   | AAAAATAATAAATATATAATTTAAAAATACCTATACCA         | 14370 | 14332 | c      |
| Gap3_seq2.1  | AAATTTGTAAAAAATGTAGATTAATAAGAAGAAATAAAA        | 14543 | 14581 | w      |
| Gap3_PRA7    | TTTGAATTTATAAATGATTTTGAACCACATGAAGATGAG        | 14824 | 14786 | c      |
| Gap3_PRA2    | ATTATTTTAAGTTTTCTTATAATGGATGTAGAGTT            | 15007 | 15041 | w      |
| Gap3_seq2.2  | TTAATTCTTTACCTCTTATAGCTTGATTTAATGTT            | 15218 | 15183 | c      |
| Gap3_PRA8    | TTAATTTTATTATTCAATTTATTCCTATATTTTTTACACCA      | 15577 | 15537 | c      |
| 5929.1       | TTAATGTTGTTTTACCATGATCTATATGACCTATAGTACCTACA   | 16270 | 16227 | c      |
| EFT1_long    | CCTGTAACCTACGTACCTCTACCTGTTATTAATAAAACTATCTTC  | 16895 | 16852 | c      |
| AA9YN12_EFTU | TTTATAACCTGATAAAAAAGGTTTATGTCTACCTCCTTC        | 17190 | 17152 | c      |
| AA9YN12-F2   | AAAATGGCTATGCCAGGTG                            | 17263 | 17281 | w      |
| AA9YN12-FR1  | TGTAATAATACCTGCTCC                             | 17388 | 17371 | c      |
| AA9YN12-F3   | AACTGAAATAGATAGGTTTTG                          | 17875 | 17894 | w      |
| AA9YN12-FR2  | CTATTATTAGTGTACATTGAA                          | 18066 | 18045 | c      |
| AA9YN12-RR2  | GTAGTTGGATTATATGTGG                            | 18606 | 18624 | w      |
| AA9YN12-R3   | CCTGGTGGTGCGCC                                 | 18765 | 18752 | c      |
| AA9YN12-RR3  | GAATTTTTAAATAGAATTGATG                         | 19061 | 19082 | w      |
| AA9YN12-R2   | ATACTAAAGATTTACCACAAATATC                      | 19328 | 19304 | c      |
| Clpc.1       | TTGTTTTTAAATAATGATATTTGGATAATAGAATGTGA         | 19523 | 19560 | w      |
| Clpc.2       | TATAGTATTAATAACTTTTTAAAAGAGTTATAATAATAATTAAG   | 19676 | 19721 | w      |
| Clpc3        | TTCTTTCATCATCTACAGGAGT                         | 20379 | 20400 | w      |
| Gap2.1       | AGCATTTGATTTGAGATCTTAGTAATATGGGTT              | 21142 | 21174 | w      |
| Gap2_seq1.1  | TTAAAAATAAAAAATTATCATTAACATAAAAAA              | 21580 | 21615 | w      |

|             |                                               |       |       |   |
|-------------|-----------------------------------------------|-------|-------|---|
| Gap2.2      | TTTTGTTGAATTTATTTTTATTGAATATGTTTTATT          | 22125 | 22090 | c |
| rpoB3       | GTTAAATATGTTATTGTATTTGT                       | 22298 | 22276 | c |
| Gap2_seq1.2 | TTTTAAAATAATTTCACTTATTGAAGAGTGTTT             | 22467 | 22435 | c |
| rpoB.1      | ATGCATTTTTGAACCCATAAGACCCCTAC                 | 23004 | 22976 | c |
| rpoB.2      | TTTATTACAATACCAGATGAATAGGAAATTATACAA          | 23123 | 23088 | c |
| rpoC.2      | TATTAGTTGGTTATCTTAATTTAGCTATTATACATG          | 25725 | 25760 | w |
| rpoC.1      | GACATATAATATATACTGTAATTCATTAATTCTGAAC         | 25822 | 25859 | w |
| 8452.1      | AAAAAAAAAGTCAATTTATACAAATATCACAAT             | 26221 | 26252 | w |
| Gap1.2      | AATATTATAAAAAAAAAATAGATAGGGATGATTTTGA         | 27201 | 27235 | w |
| Gap_1.1     | ATATATTGTTGAGTATTAGTATTTAATAATAAACCA          | 27325 | 27290 | c |
| rps2.1      | AATTATAAAATAATCTATACCATCCAGATCCT              | 27963 | 27932 | c |
| api1_rps2   | CACTTTTCCATGAAGATAAAAAATAAAAGTTTAATGTTAATTCTG | 28265 | 28221 | c |

Figure S1

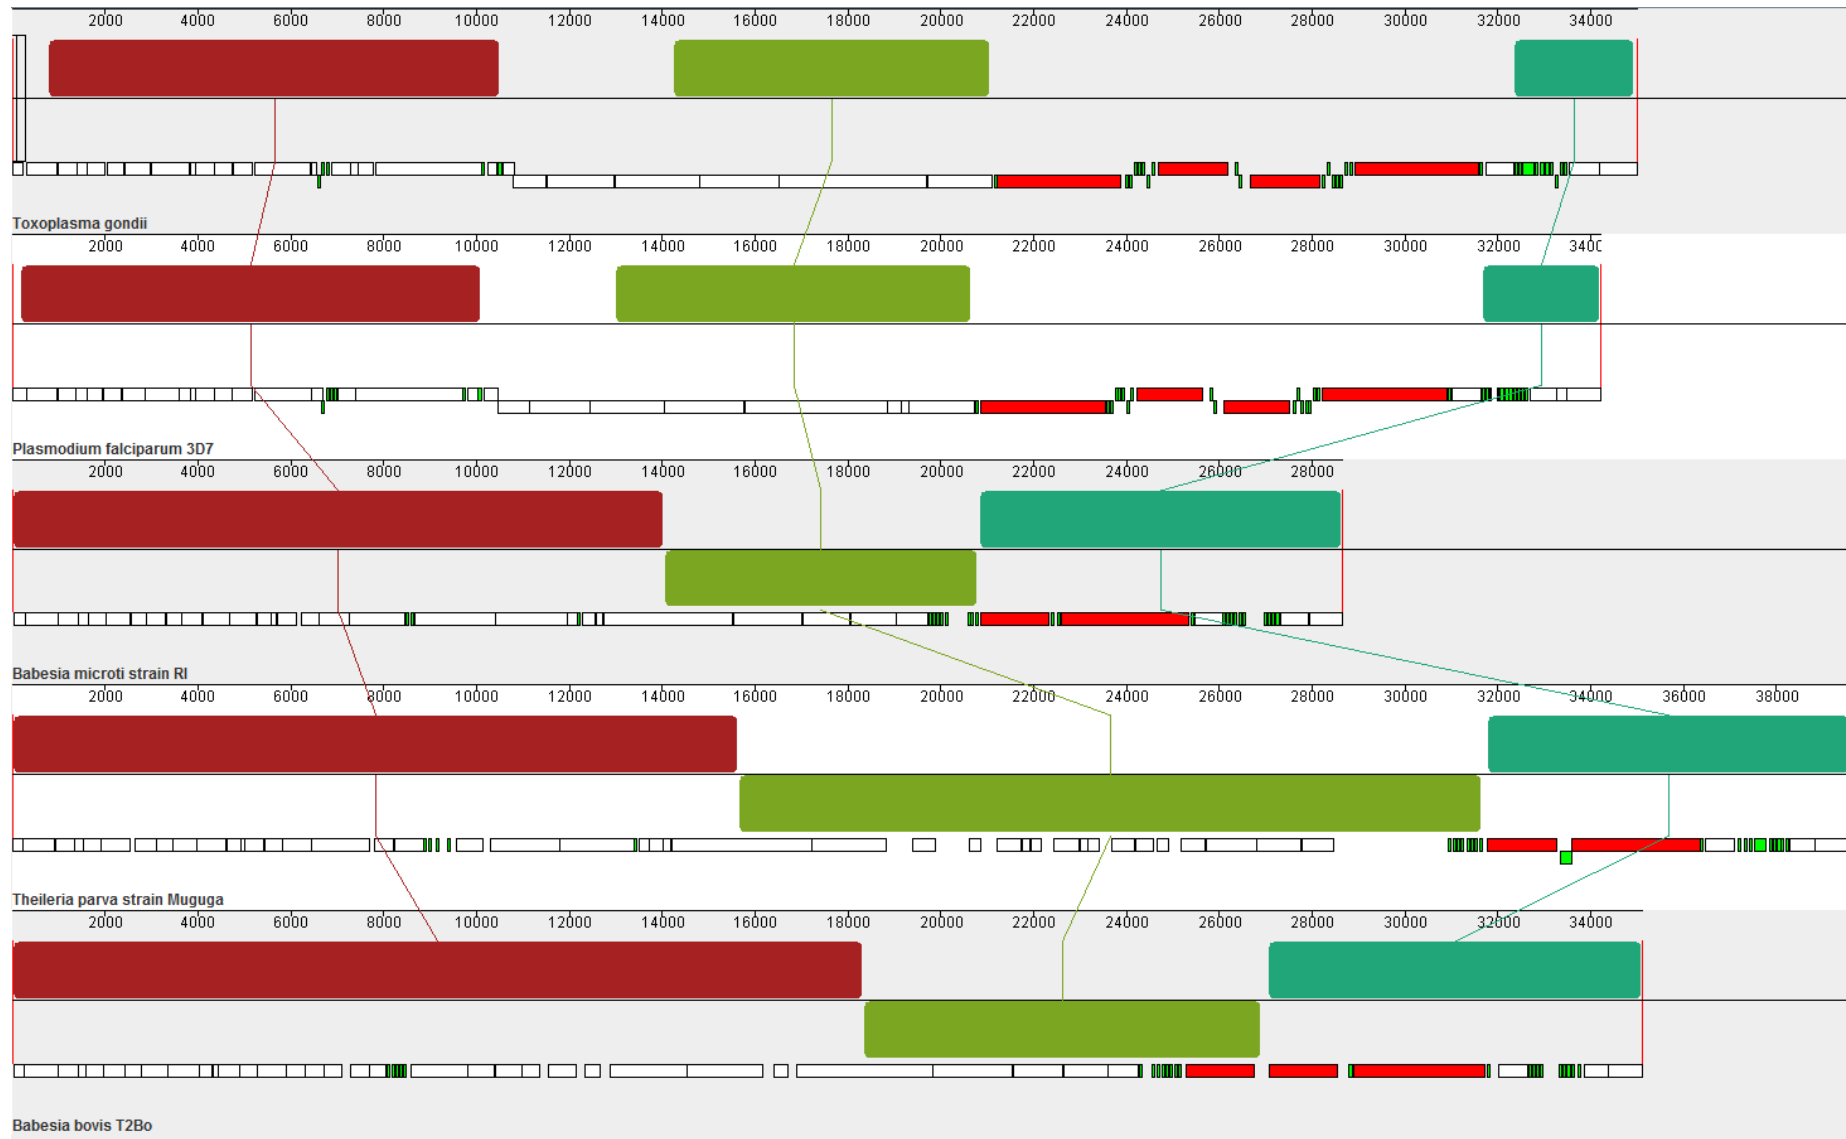



Figure S3

*Babesia microti* R1

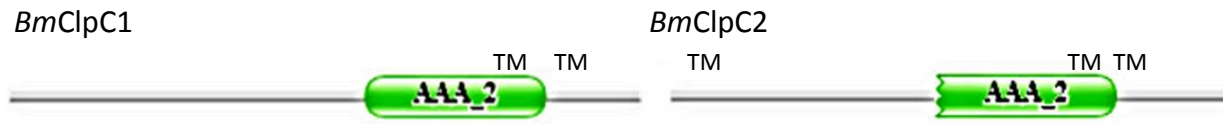

*Theileria parva* Mugaga

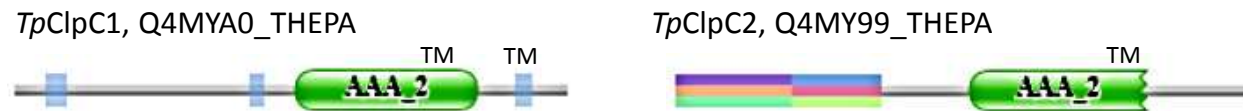

*Babesia bovis* T2Bo

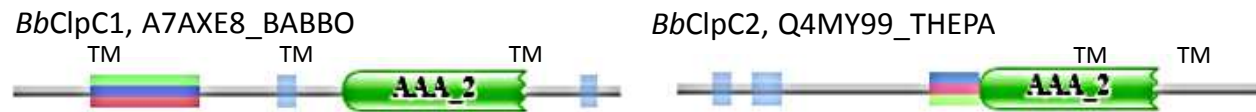

Supplement: pone.0107939.s001.pdf [file pone.0107939.s001.pdf]
